1 **Revisiting and expanding the meta-analysis of variation: The log**  
2 **coefficient of variation ratio, lnCVR**

3 Alistair M. Senior<sup>1,2,\*</sup>, Wolfgang Viechtbauer<sup>3</sup>, and Shinichi Nakagawa<sup>4,5,\*</sup>

4

5 1. University of Sydney, Charles Perkins Centre, Sydney, NSW 2006, Australia.

6 2. University of Sydney, School of Life and Environmental Sciences, Sydney, NSW 2006,  
7 Australia.

8 3. Department of Psychiatry and Neuropsychology, School for Mental Health and  
9 Neuroscience, Faculty of Health, Medicine, and Life Sciences, Maastricht University, 6200  
10 MD Maastricht, The Netherlands

11 4. Evolution & Ecology Research Centre and School of Biological, Earth and Environmental  
12 Sciences, University of New South Wales, Sydney, NSW 2052, Australia.

13 5. Diabetes and Metabolism Division, Garvan Institute of Medical Research, 384 Victoria  
14 Street, Darlinghurst, Sydney, NSW 2010, Australia.

15

16 \* Authors to whom correspondence ought to be addressed.

17 Email: [alistair.senior@sydney.edu.au](mailto:alistair.senior@sydney.edu.au)

18 Email: [s.nakagawa@unsw.edu.au](mailto:s.nakagawa@unsw.edu.au)

19 Tel: +64 (0) 286 270 703

20

21 Running Head: Meta-Analysis of lnCVR

22 Keywords:

23 Cross-Over Design, Cross-Correlation, Effect-Size, Heterogeneity, Paired Design, Sampling

24 Variance, Standard Deviation, Taylor's Law, Variance

25 **Abstract**

26 Meta-analyses are frequently used to quantify the difference in the average values of two  
27 groups (e.g., control and experimental treatment groups), but examine the difference in the  
28 variability (variance) of two groups. For such comparisons, the two relatively new effect size  
29 statistics, namely the log-transformed ‘variability ratio’ (the ratio of two standard deviations;  
30 lnVR) and the log-transformed ‘CV ratio’ (the ratio of two coefficients of variation; lnCVR)  
31 are useful. In practice, lnCVR may be of most use because a treatment may affect the mean  
32 and the variance simultaneously. We review current, and propose new, estimators for lnCVR  
33 and lnVR. We also present methods for use when the two groups are dependent (e.g., for  
34 cross-over and pre-test-post-test designs). A simulation study evaluated the performance of  
35 these estimators and we make recommendations about which estimators one should use to  
36 minimise bias. We also present two worked examples that illustrate the importance of  
37 accounting for the dependence of the two groups. We found that the degree to which  
38 dependence is accounted for in the sampling variance estimates can impact heterogeneity  
39 parameters such as  $\tau^2$  (i.e., the between-study variance) and  $I^2$  (i.e., the proportion of the  
40 total variability due to between-study variance), and even the overall effect, and in turn  
41 qualitative interpretations. Meta-analytic comparison of the variability between two groups  
42 enables us to ask completely new questions and to gain fresh insights from existing datasets.  
43 We encourage researchers to take advantage of these convenient new effect size measures for  
44 the meta-analysis of variation.

45

## 46 1. INTRODUCTION

47 Meta-analysis is often used to evaluate studies comparing the average of two groups. These  
48 are usually treatment groups in an experiment/trial, one being a concurrent control, but may  
49 also represent naturally occurring groups (e.g., different sexes). The standardised mean  
50 difference (SMD; also known as Cohen's  $d$  and its associated derivatives), which is the  
51 difference between group means divided by the within-study variability, is a commonly-used  
52 effect size measure for this purpose<sup>1</sup>. SMD is popular because it is 'unitless', meaning it can  
53 be used to compare the results of studies that report outcomes in different units<sup>2</sup>. A similar  
54 unitless effect size measure, which can also be used to compare the means of two groups, is  
55 the logarithm of the ratio of the means of the groups. This effect size measure is known as the  
56 ratio of means in medicine (ROM<sup>3</sup>) and the log response ratio in ecology and evolution  
57 (lnRR<sup>4</sup>). Throughout we follow the lnRR notation as this will help to draw parallels with  
58 other effect size measures as we progress, but the reader should not be confused with the  
59 (logarithm of) risk ratio, which is also sometimes denoted (ln)RR. Surveys have shown that  
60 lnRR is the most widely used effect size measure in ecology and evolution<sup>5-7</sup>. Moreover,  
61 SMD and lnRR collectively account for over half of all meta-analyses in ecology<sup>6,7</sup>, meaning  
62 comparisons between group means is the most widespread aim of meta-analysis in this field.  
63 SMD also seems to be among the most used standardised effect statistics in the medical and  
64 social sciences<sup>8</sup>.

65

66 Two groups may not only differ in terms of their means, but also their variances<sup>9</sup>. At the  
67 most basic level, experimental treatments may directly increase or decrease the total amount  
68 of variance in a system due to inter-individual variability in response. Many biological  
69 systems also appear to display a mean-variance relationship<sup>10-12</sup>; most commonly, increasing  
70 averages are associated with increasing variances. Perhaps the most well-known example of a

71 biological mean-variance relationship comes from ecology and is known as Taylor's Law.  
72 This 'law' has been widely observed, and states that as mean population density increases,  
73 variance in population density also increases<sup>13,14</sup>. Where mean-variance relationships are  
74 present, a treatment may indirectly cause groups to have differing variances by altering the  
75 mean.

76

77 Nakagawa, Poulin, Mengersen, et al.<sup>15</sup> proposed a number of methods that allow the user to  
78 test for differences in the variance of groups meta-analytically. Among the methods  
79 proposed, the logarithm of the ratio of the standard deviations (SDs), named log 'variability  
80 ratio' (lnVR) and the logarithm of the ratio of the coefficients of variation (CV), termed the  
81 log 'CV ratio' (lnCVR), are most readily integrated into the standard meta-analytic paradigm;  
82 i.e. a contrast-based model using an effect size that corresponds to an effect relative to a  
83 concurrent control<sup>16,17</sup>. Of the two, lnCVR is perhaps the more useful measure where a  
84 mean-variance relationship is likely to exist. Nakagawa, Poulin, Mengersen, et al.<sup>15</sup> highlight  
85 that meta-analysing variation may be used to answer completely novel questions, but it can  
86 also be used to provide fresh insights into the topics on which a meta-analysis of means was  
87 already conducted. Indeed, lnCVR has already been applied in such diverse fields as ecology  
88<sup>18</sup>, evolution<sup>19</sup>, agriculture<sup>20</sup>, health<sup>17</sup>, and the social sciences<sup>21</sup>. It is important to note that  
89 lnCVR (and also lnVR) require the same data to calculate as is already needed for computing  
90 SMD or lnRR values.

91

92 Our aims in this paper are threefold. First, we review existing and propose new estimators for  
93 lnCVR and its sampling error variance. These include, for the first time, estimators of the  
94 sampling variance when the two groups (treatment and control) are not independent (as may  
95 occur, for example, in cross-over trials or in paired, single-subject, or pre-test-post-test

96 designs). Second, we conduct a simulation study to investigate the performance of the  
97 different estimators. Finally, we present two case studies using these techniques, and  
98 illustrate the importance of accounting for dependence between the two treatment groups in  
99 the estimation of sampling variation and other heterogeneity parameters (e.g.,  $\tau^2$ , the  
100 between-study variance, and  $I^2$  <sup>22</sup>).

101

## 102 **2. METHODS**

### 103 **2.1 Point estimators when groups are independent**

104 Let  $x_T \sim N(\mu_T, \sigma_T)$  and  $x_C \sim N(\mu_C, \sigma_C)$  denote normally distributed random variables with  
105 true means (i.e., expected values) given by  $\mu_T$  and  $\mu_C$  and true standard deviations  $\sigma_T$  and  $\sigma_C$ .

106 For independent random samples based on these variables (e.g., representing some outcome  
107 of interest measured in a treatment and control group) of size  $n_T$  and  $n_C$ , let  $\bar{x}_T$  and  $\bar{x}_C$  denote  
108 the respective sample means and  $s_T$  and  $s_C$  the corresponding standard deviations for the two  
109 groups. Then comparisons between the means, variances and coefficients of variation for two  
110 groups can be made using the lnRR, lnVR and lnCVR effect size measures, respectively.

111 “Naïve” estimators of these effect statistics are:

$$\ln\text{RR}_1 = \ln\left(\frac{\bar{x}_T}{\bar{x}_C}\right),$$

$$\ln\text{VR}_1 = \ln\left(\frac{s_T}{s_C}\right),$$

$$\ln\text{CVR}_1 = \ln\left(\frac{\text{CV}_T}{\text{CV}_C}\right),$$

112 where ln denotes the natural logarithm and  $\text{CV}_T = s_T/\bar{x}_T$  and  $\text{CV}_C = s_C/\bar{x}_C$  denote the  
113 coefficients of variation in the treatment and control group, respectively.

114

115 While these naïve estimators are consistent and asymptotically unbiased, we can add  
116 corrections for the sample size based on a second-order Taylor expansion (also known as, the  
117 second order delta method) for each statistic<sup>15,23,24</sup>. For the lnRR, Lajeunesse<sup>23</sup> demonstrated  
118 such a correction is important to obtain unbiased estimation especially when sample size is  
119 small;

$$\ln\text{RR}_2 = \ln\left(\frac{\bar{x}_T}{\bar{x}_C}\right) + \frac{1}{2}\left(\frac{s_T^2}{n_T\bar{x}_T^2} - \frac{s_C^2}{n_C\bar{x}_C^2}\right).$$

120 Similarly, for the lnVR, Nakagawa, Poulin, Mengersen, et al.<sup>15</sup> proposed:

$$\ln\text{VR}_2 = \ln\left(\frac{s_T}{s_C}\right) + \frac{1}{2}\left(\frac{1}{n_T - 1} - \frac{1}{n_C - 1}\right).$$

121 Combing lnRR<sub>2</sub> and lnVR<sub>2</sub>, one obtains:

$$\ln\text{CVR}_2 = \ln\left(\frac{CV_T}{CV_C}\right) + \frac{1}{2}\left(\frac{1}{n_T - 1} - \frac{1}{n_C - 1}\right) + \frac{1}{2}\left(\frac{s_C^2}{n_C\bar{x}_C^2} - \frac{s_T^2}{n_T\bar{x}_T^2}\right).$$

122 Note that Nakagawa, Poulin, Mengersen, et al.<sup>15</sup> originally suggested the an estimator of  
123 lnCVR that missed the bias correction pertaining to lnRR (i.e.  $\frac{1}{2}\left(\frac{s_C^2}{n_C\bar{x}_C^2} - \frac{s_T^2}{n_T\bar{x}_T^2}\right)$ ). We also note  
124 that an alternative estimator of lnCVR could also be obtained based on  $\left(1 + \frac{1}{4n}\right) CV$ , which it  
125 has been suggested acts as a ‘rough’ bias correction for the CV (e.g.<sup>25</sup>). However, this  
126 estimator is not recommended here, and it does not perform well (see Supplementary  
127 Materials S1, Text S1).

128

## 129 **2.2 Dispersion estimators when the two groups are independent**

130 The original estimators of the sampling (error) variance for lnRR<sup>4</sup> and lnVR<sup>15</sup> are based on  
131 the first-order Taylor expansion; they are respectively:

$$s^2(\ln\text{RR}_1) = \frac{s_C^2}{n_C\bar{x}_C^2} + \frac{s_T^2}{n_T\bar{x}_T^2},$$

$$s^2(\ln VR_1) = \frac{1}{2} \left( \frac{1}{n_c - 1} + \frac{1}{n_T - 1} \right).$$

132 Based on these, for lnCVR Nakagawa, Poulin, Mengersen, et al.<sup>15</sup> proposed:

$$s^2(\ln CVR_1) = \frac{s_C^2}{n_c \bar{x}_C^2} + \frac{1}{2(n_c - 1)} - 2\rho \sqrt{\frac{s_C^2}{n_c \bar{x}_C^2} \frac{1}{2(n_c - 1)}} \\ + \frac{s_T^2}{n_T \bar{x}_T^2} + \frac{1}{2(n_T - 1)} - 2\rho \sqrt{\frac{s_T^2}{n_T \bar{x}_T^2} \frac{1}{2(n_T - 1)'}}$$

133 where  $\rho$  is the correlation between the log mean and log SD. Nakagawa, Poulin, Mengersen,  
 134 et al.<sup>15</sup> suggested that  $\rho$  can be estimated based on the correlation between the log sample  
 135 mean and log sample SD across the studies included in a meta-analysis. However, in doing so  
 136 one risks conflating within- and between-study correlation (i.e., the correlation in the  
 137 bivariate sampling distribution of the sample mean and sample SD could be very different  
 138 than the correlation of the true means and SDs across studies). In fact, for observations that  
 139 come from an underlying population distribution that is symmetric (e.g. a normal  
 140 distribution), the sample mean and variance are uncorrelated<sup>26</sup>. Thus, for the case considered  
 141 here where  $\rho = 0$  the equation above simplifies to:

$$s^2(\ln CVR_1) = \frac{s_C^2}{n_c \bar{x}_C^2} + \frac{1}{2(n_c - 1)} + \frac{s_T^2}{n_T \bar{x}_T^2} + \frac{1}{2(n_T - 1)}.$$

142 As a better estimator for the sampling variance of lnRR, Lajeunesse<sup>23</sup> derived and tested the  
 143 following sampling variance based on the second-order Taylor expansion:

$$s^2(\ln RR_2) = \frac{s_C^2}{n_c \bar{x}_C^2} + \frac{s_C^4}{2n_c^2 \bar{x}_C^4} + \frac{s_T^2}{n_T \bar{x}_T^2} + \frac{s_T^4}{2n_T^2 \bar{x}_T^4}.$$

144 Similarly, we can derive the following sampling variance for lnVR based on the second-order  
 145 Taylor expansion as:

$$s^2(\ln VR_2) = \frac{1}{2} \left( \frac{1}{n_c - 1} + \frac{1}{(n_c - 1)^2} + \frac{1}{n_T - 1} + \frac{1}{(n_T - 1)^2} \right).$$

146 Accordingly, the complete estimator of the sampling variance for  $\ln\text{CVR}$ , based on  $s^2(\ln\text{RR}_2)$   
 147 and  $s^2(\ln\text{VR}_2)$  is:

$$s^2(\ln\text{CVR}_2) = \frac{s_C^2}{n_C \bar{x}_C^2} + \frac{s_C^4}{2n_C^2 \bar{x}_C^4} + \frac{1}{2(n_C - 1)} + \frac{1}{2(n_C - 1)^2}$$

$$+ \frac{s_T^2}{n_T \bar{x}_T^2} + \frac{s_T^4}{2n_T^2 \bar{x}_T^4} + \frac{1}{2(n_T - 1)} + \frac{1}{2(n_T - 1)^2}.$$

148 In the supplementary materials, we propose estimators of the sampling covariance based on  
 149 the above, which can be used when multiple treatment groups are contrasted with the same  
 150 control<sup>27</sup> (see Supplementary Materials S1, Text S2)

151

### 152 **2.3 Point estimators when groups are dependent**

153 Due to experimental design, control and treatment groups are often not independent of one  
 154 another. A clear example of this dependency is in the case of a cross-over design where the  
 155 same individuals are subjected to both control and experimental treatments at two different  
 156 time points. The point estimates given above will perform the same way regardless of  
 157 whether we are dealing with independent or dependent groups. In cross-over studies,  
 158 however,  $n_T = n_C \equiv n$ , unless dropouts are included in a pre-post design, in which case we  
 159 recommend that  $n = n_{\text{post}}$  (i.e. the sample size in the post-treatment condition) is used. This is  
 160 because the correlation between pre and post-treatment measurements can only be calculated  
 161 based on  $n$ , which assumes  $n_T = n_C$  (see the next section). We can rewrite the dependent  
 162 cases of  $\ln\text{RR}_1$  and  $\ln\text{RR}_2$  as:

$$\ln\text{RR}_3 = \ln\left(\frac{\bar{x}_T}{\bar{x}_C}\right),$$

$$\ln\text{RR}_4 = \ln\left(\frac{\bar{x}_T}{\bar{x}_C}\right) + \frac{1}{2} \left( \frac{s_T^2}{n \bar{x}_T^2} - \frac{s_C^2}{n \bar{x}_C^2} \right),$$



163 where subscripts 3 and 4 indicate the naïve estimator and estimator based the second-order  
 164 Taylor expansion, respectively. Similarly, for  $\ln VR$  and  $\ln CVR$ , we have:

$$\ln VR_3 = \ln\left(\frac{s_T}{s_C}\right),$$

$$\ln VR_4 = \ln\left(\frac{s_T}{s_C}\right) + \frac{1}{2}\left(\frac{1}{n_T - 1} - \frac{1}{n_C - 1}\right) = \ln\left(\frac{s_T}{s_C}\right),$$

$$\ln CVR_3 = \ln\left(\frac{CV_T}{CV_C}\right),$$

$$\ln CVR_4 = \ln\left(\frac{CV_T}{CV_C}\right) + \frac{1}{2}\left(\frac{s_C^2}{n\bar{x}_C^2} - \frac{s_T^2}{n\bar{x}_T^2}\right).$$

165 **2.4 Dispersion estimators when the two groups are dependent**

166 In dependent cases estimates of the sampling variance need to account for the correlation  
 167 between measurements from the same replicates on the two occasions (i.e. cross-correlation  
 168 <sup>28</sup>). Based on the first-order Taylor expansion, the sampling variance for  $\ln RR$  is:

$$s^2(\ln RR_3) = \frac{s_C^2}{n_C \bar{x}_C^2} + \frac{s_T^2}{n_T \bar{x}_T^2} - 2r_{CT} \sqrt{\frac{s_C^2}{n_C \bar{x}_C^2}} \sqrt{\frac{s_T^2}{n_T \bar{x}_T^2}},$$

169 where  $r_{CT}$  is a cross-context correlation value estimated from the two sets of measurements  
 170 on the same replicate when they are under the control and treatment conditions <sup>29</sup>. As  
 171 discussed above for dependent studies  $n_T = n_C \equiv n$  meaning  $s^2(\ln RR_3)$  simplifies to:

$$s^2(\ln RR_3) = \frac{s_C^2}{n\bar{x}_C^2} + \frac{s_T^2}{n\bar{x}_T^2} - r_{CT} \frac{2s_C s_T}{n\bar{x}_C \bar{x}_T}.$$

172 If based on the second-order Taylor expansion <sup>23</sup>, the estimator of the sampling variance for  
 173  $\ln RR$  is:

$$s^2(\ln RR_4) = \frac{s_C^2}{n\bar{x}_C^2} + \frac{s_T^2}{n\bar{x}_T^2} - r_{CT} \frac{2s_C s_T}{n\bar{x}_C \bar{x}_T} + \frac{s_C^4}{2n^2 \bar{x}_C^4} + \frac{s_T^4}{2n^2 \bar{x}_T^4} + r_{CT}^2 \frac{s_C^2 s_T^2 (\bar{x}_C^4 + \bar{x}_T^4)}{2n^2 \bar{x}_C^4 \bar{x}_T^4}.$$

174 We can also derive the sampling variance for dependent cases of  $\ln VR$  based on the first-  
 175 order Taylor expansion as:

$$s^2(\ln VR_3) = \frac{1}{2} \left( \frac{1}{(n_C - 1)} + \frac{1}{(n_T - 1)} \right) - r_{CT}^2 \sqrt{\frac{1}{(n_C - 1)}} \sqrt{\frac{1}{(n_T - 1)'}}$$

176 which, where  $n_T = n_C \equiv n$ , simplifies to:

$$s^2(\ln VR_3) = \frac{1 - r_{CT}^2}{n - 1}.$$

177 Based on the second-order Taylor expansion, we have the sampling variance for dependent  
178 cases of  $\ln VR$  as:

$$s^2(\ln VR_4) = \frac{1}{n - 1} - r_{CT}^2 \frac{1}{n - 1} + \frac{1}{(n - 1)^2} + r_{CT}^4 \frac{s_C^8 + s_T^8}{2(n - 1)^2 s_C^4 s_T^4}$$

179 From the sampling variances for  $\ln RR$  and  $\ln VR$ , we have the sampling variance for  $\ln CVR$   
180 with first- and second-order Taylor expansion as:

$$s^2(\ln CVR_3) = \frac{s_C^2}{n \bar{x}_C^2} + \frac{s_T^2}{n \bar{x}_T^2} - r_{CT} \frac{2s_C s_T}{n \bar{x}_C \bar{x}_T} + \frac{1}{n - 1} - r_{CT}^2 \frac{1}{n - 1},$$

$$s^2(\ln CVR_4) = \frac{s_C^2}{n \bar{x}_C^2} + \frac{s_T^2}{n \bar{x}_T^2} - r_{CT} \frac{2s_C s_T}{n \bar{x}_C \bar{x}_T} + \frac{s_C^4}{2n^2 \bar{x}_C^4} + \frac{s_T^4}{2n^2 \bar{x}_T^4} + r_{CT}^2 \frac{s_C^2 s_T^2 (\bar{x}_C^4 + \bar{x}_T^4)}{2n^2 \bar{x}_C^4 \bar{x}_T^4}$$

$$+ \frac{1}{n - 1} - r_{CT}^2 \frac{1}{n - 1} + \frac{1}{(n - 1)^2} + r_{CT}^4 \frac{s_C^8 + s_T^8}{2(n - 1)^2 s_C^4 s_T^4}.$$

181 Note that, where  $r$  is positive the estimated sample variance for a dependent estimator will be  
182 smaller than its independent equivalent, but that as  $r$  shrinks to 0 the dependent case  
183 converges on the independent; e.g. assuming  $n_C = n_T$ , where  $r > 0$ ,  $s^2(\ln CVR_3) < s^2(\ln CVR_1)$ ,  
184 but where  $r = 0$ ,  $s^2(\ln CVR_3) = s^2(\ln CVR_1)$ .

185

### 186 3. SIMULATION

#### 187 3.1 Simulation study design

188 We simulated a two-group experiment/trial, where a pair of groups is based on  $n_T$  and  $n_C$   
189 random samples drawn from populations under an experimental treatment and control  
190 conditions. The treatment and control populations have means  $\mu_T$  and  $\mu_C$  and standard

191 deviations (SDs)  $\sigma_T$  and  $\sigma_C$ , respectively. The  $i$ th sample in each group,  $y_{Ti}$  ( $i = 1 \dots n_T$ ) and  
192  $y_{Ci}$  ( $i = 1 \dots n_C$ ) was drawn from a bivariate normal distribution as follows:

$$\begin{pmatrix} y_{Ti} \\ y_{Ci} \end{pmatrix} \sim N \left( \begin{bmatrix} \mu_T \\ \mu_C \end{bmatrix}, \begin{bmatrix} \sigma_T^2 & \rho_{CT}\sigma_T\sigma_C \\ \rho_{CT}\sigma_C\sigma_T & \sigma_C^2 \end{bmatrix} \right)$$

193 Where  $\begin{bmatrix} \mu_T \\ \mu_C \end{bmatrix}$  are the population means of the two groups,  $\begin{bmatrix} \sigma_T^2 & \rho_{CT}\sigma_T\sigma_C \\ \rho_{CT}\sigma_C\sigma_T & \sigma_C^2 \end{bmatrix}$  is a variance  
194 co-variance matrix specifying the variances of the two groups with  $\rho_{CT}$  giving the degree of  
195 correlation among the  $i$ th samples in the two groups and all other parameters are as above.  
196 When where  $\rho_{CT} \neq 0$  the  $i$ th data in the two groups are correlated (i.e. dependent or paired  
197 samples as in a cross-over design).

198

199 In all simulations,  $\mu_C = 100$  and  $\sigma_C = 20$ , which across the parameters tested ensures positive  
200 sample means (required for log transformation). We explored values of  $\mu_T$  ranging between  
201  $\mu_C \times e^{-0.5}$  and  $\mu_C \times e^{0.5}$  and values of  $\sigma_T$  ranging between  $\sigma_C \times e^{-0.5}$  and  $\sigma_C \times e^{0.5}$ , meaning the  
202  $\ln(\mu_T / \mu_C)$  and  $\ln(\sigma_T / \sigma_C)$  is between -0.5 and 0.5. All combinations were explored and  
203 where  $\ln(\mu_T / \mu_C) = \ln(\sigma_T / \sigma_C)$  the coefficient of variance (CV) of the two groups will be  
204 identical. We explored  $n_C = 8, 16$  and  $42$ , with  $n_C = n_T$  and, with  $n_C < n_T$  (independent case).  
205 We also explored  $\rho_{CT} = 0$  and  $\rho_{CT} = 0.8$ . For each set of parameters, we simulated 100,000  
206 experiments.

207

208 Based on the sample means and SDs of each simulated experiment, we calculated  $\ln\text{CVR}_1$   
209 and  $\ln\text{CVR}_2$  for independent cases ( $\rho_{CT} \neq 0$ ) and  $\ln\text{CVR}_3$  and  $\ln\text{CVR}_4$  for dependent cases  
210 ( $\rho_{CT} \neq 0$ ). We also calculated the sampling variance estimators  $s^2(\ln\text{CVR}_1)$  and  $s^2(\ln\text{CVR}_2)$   
211 where  $\rho_{CT} \neq 0$ , and  $s^2(\ln\text{CVR}_3)$  and  $s^2(\ln\text{CVR}_4)$  where  $\rho_{CT} \neq 0$ . We calculated bias in the  $i$ th  
212 estimator as:

$$\text{bias}[\ln\text{CVR}_i] = \frac{1}{K} \sum_{k=1}^K \ln\text{CVR}_{ik} - \ln\left(\frac{\sigma_T/\mu_T}{\sigma_C/\mu_C}\right),$$

213 where  $k$  is the  $k$ th value of  $K$  (here 100,000) simulated values of  $\ln\text{CVR}_i$  ( $k = 1 \dots K$ ). This bias  
214 can be interpreted as the mean deviation of the  $i$ th estimator of  $\ln\text{CVR}$  from the true  
215 population value. We calculated bias in sampling variance estimator  $i$  as:

$$\text{bias}[s^2(\ln\text{CVR}_i)] = \frac{s^2(\ln\text{CVR}_i) - \theta_j^2}{\theta_j^2} \times 100,$$

216 where  $s^2(\ln\text{CVR}_i)$  is the value of the  $i$ th sampling variance based on the simulated population  
217 statistics and sample sizes and  $\theta_j$  is the SD among  $K$  simulated effect sizes estimated using  
218 estimator  $j$ . This bias can be interpreted as the percentage by which the sampling variance  
219 estimator deviates from the true value (i.e. 100 = the estimator is twice the true value). We  
220 calculated coverage as the proportion of 95% confidence intervals (CIs) that include  
221  $\ln\left(\frac{\sigma_T/\mu_T}{\sigma_C/\mu_C}\right)$ . For a combination of the  $j$ th effect size estimator ( $\ln\text{CVR}_j$ ) and  $i$ th sampling  
222 variance  $s^2(\ln\text{CVR}_i)$ , 95% CIs were constructed as:

$$95\% \text{ CI} = \ln\text{CVR}_j \pm z_{0.975} s(\ln\text{CVR}_i)$$

223 where  $\ln\text{CVR}_j$  is the estimated effect size for the simulated sample,  $s(\ln\text{CVR}_i)$  an estimate of  
224 the standard error (SE; the square root of the estimated sampling variance), and  $z_{0.975}$  is the  
225 function of the 0.975<sup>th</sup> quantile of a  $z$  distribution (approx. 1.96). Simulations and analyses  
226 were performed in R v3.5.1;<sup>30</sup> and using the ‘mvrnorm’ function in the *MASS* package<sup>31</sup>.  
227 All data and code presented in this manuscript can be found at  
228 ([https://github.com/AlistairMcNairSenior/lnCVR\\_Estimators\\_Sim](https://github.com/AlistairMcNairSenior/lnCVR_Estimators_Sim)).

229

### 230 **3.2 Simulation results**

231 We begin with the case where the two groups are independent ( $\rho_{CT} = 0$ ). Figure 1 shows bias  
232 in the estimated effect as a function of sample size and the log the ratio of the means and SDs

233 in the two groups. Across the diagonal elements of each plot (black-dashed line) the  
 234 underlying CV of the two populations is identical (even if the means and SDs differ;  
 235  $\ln\left(\frac{\sigma_T/\mu_T}{\sigma_C/\mu_C}\right) = 0$ ), elements above the line correspond to the CV of the treatment population  
 236 being greater than that of the control group ( $\ln\left(\frac{\sigma_T/\mu_T}{\sigma_C/\mu_C}\right) > 0$ ), and elements below the line the  
 237 opposite ( $\ln\left(\frac{\sigma_T/\mu_T}{\sigma_C/\mu_C}\right) < 0$ ).  $\ln\text{CVR}_1$  overestimates positive effects and slightly under-estimate  
 238 negative effects, with bias being most profound where the sample size is small.  $\ln\text{CVR}_2$ , on  
 239 the other hand, displays no systematic bias. Figure 2 shows the results where the sample size  
 240 of the treatment group is ~25% greater than that of the control group.  $\ln\text{CVR}_1$  showed severe  
 241 upward bias, especially where the sample size was small, where as  $\ln\text{CVR}_2$  performed with  
 242 only very minor upward bias, which all but disappeared for larger sample sizes. Given that  
 243  $\ln\text{CVR}_2$  was determined to be the most accurate estimator of the effect, we proceeded to  
 244 explore how  $\ln\text{CVR}_2$  performed in conjunction with different estimators of sampling  
 245 variance.  
 246

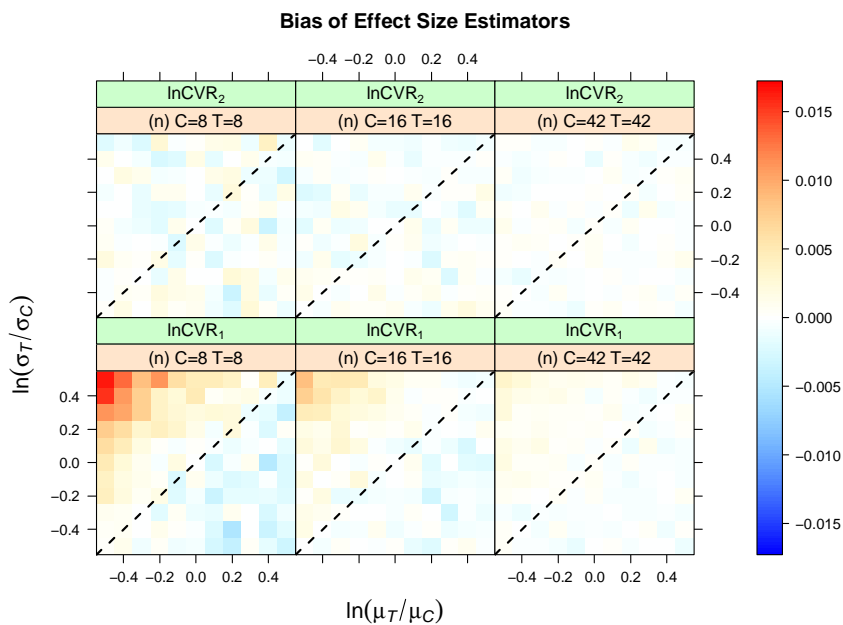

247

248 **Figure 1:** Bias in effect size estimators of lnCVR as a function of the log ratio of population  
 249 means (x-axis), SDs (y-axis) and sample size (balanced) for the case of independent treatment  
 250 and control group data ( $\rho_{CT} = 0$ ). Black dashed line indicates no effect (i.e., lnCVR = 0).  
 251

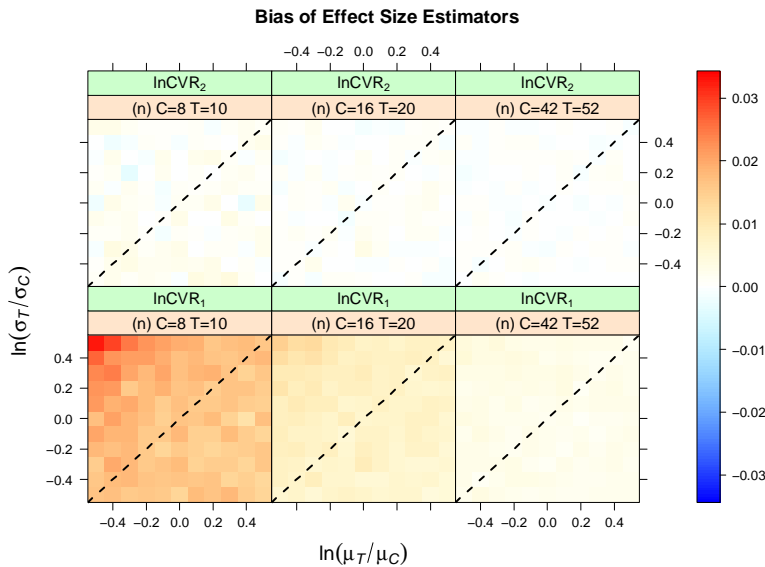

252  
 253 **Figure 2:** Bias in effect size estimators of lnCVR as a function of the log ratio of population  
 254 means (x-axis), SDs (y-axis) and sample size (unbalanced) for the case of independent  
 255 treatment and control group data ( $\rho_{CT} = 0$ ). Black dashed line indicates no effect (i.e., lnCVR  
 256 = 0).

257  
 258 The first sampling variance estimator  $s^2(\text{lnCVR}_1)$  underestimated the variance among  
 259 simulated values of  $\text{lnCVR}_2$ , particularly where the sample size was small (Figure 3). Biases  
 260 for  $s^2(\text{lnCVR}_2)$  were minimal, although there was some very slight upward bias for small  
 261 sample sizes and large positive effects (Figure 3). The coverage of 95% CIs for  $s^2(\text{lnCVR}_1)$   
 262 and  $s^2(\text{lnCVR}_2)$  (paired with  $\text{lnCVR}_2$ ) are shown in Figure 4.  $s^2(\text{lnCVR}_1)$  generated CIs that  
 263 were too narrow at smaller sample sizes, whereas again  $s^2(\text{lnCVR}_2)$  performed with little  
 264 bias. At larger sample sizes coverage was much closer to the nominal level (Figure 4),

265 although  $s^2(\text{InCVR}_2)$  still performed more accurately. The same patterns of performance were  
 266 observed for the case where  $n_C < n_T$  (Supplementary Figures S1 and S2).  
 267

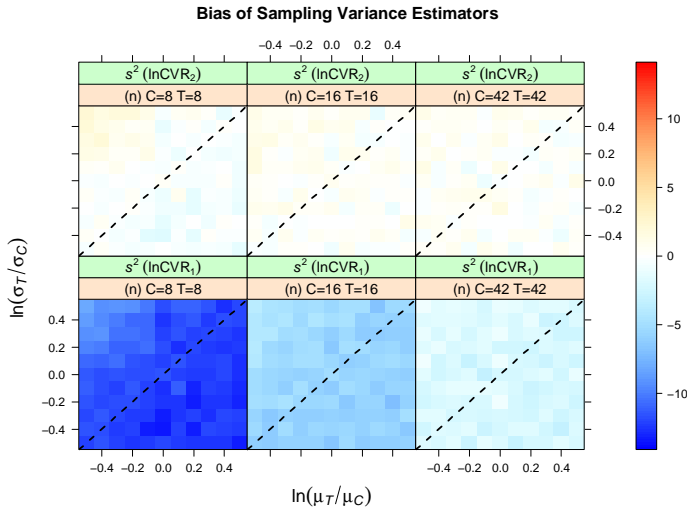

268  
 269 **Figure 3:** Bias in sampling variance estimators of InCVR as a function of the log ratio of  
 270 population means ( $x$ -axis), SDs ( $y$ -axis) and sample size (balanced) for the case of  
 271 independent treatment and control group data ( $\rho_{CT} = 0$ ). Black dashed line indicates no effect  
 272 (i.e.,  $\text{InCVR} = 0$ ).  
 273

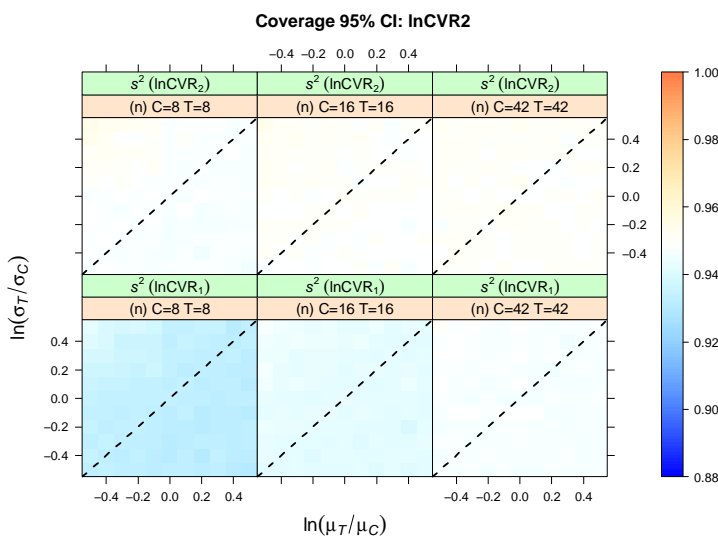

274

275 **Figure 4:** Coverage of 95% CIs based on estimators of the sampling variance of  $\ln\text{CVR}$  as a  
276 function of the log ratio of population means ( $x$ -axis), SDs ( $y$ -axis) and sample size  
277 (balanced) for the case of independent treatment and control group data ( $\rho_{CT} = 0$ ). Black  
278 dashed line indicates no effect (i.e.,  $\ln\text{CVR} = 0$ ).

279

280 For the case where treatment and control samples were dependent on one another ( $\rho_{CT} = 0.8$ )  
281  $\ln\text{CVR}_4$  out-performed  $\ln\text{CVR}_3$ , with a pattern identical to that in Figure 1 (Figure S3). With  
282 regards the two estimators for dependent sampling variances,  $s^2(\ln\text{CVR}_3)$  underestimated the  
283 variance whereas  $s^2(\ln\text{CVR}_4)$  overestimated the variance (Figure 5). These biases were  
284 within a reasonable range for larger samples, but were severe for small samples, and  
285  $s^2(\ln\text{CVR}_4)$  in particular showed extreme upward bias (reaching 60% overestimate) when the  
286 SD of the treatment group differed from that of the control group (Figure 5). The CIs  
287 generated by  $s^2(\ln\text{CVR}_3)$  had a tendency to be too narrow whereas those generated by  
288  $s^2(\ln\text{CVR}_4)$  were too wide (Figure 6).

289



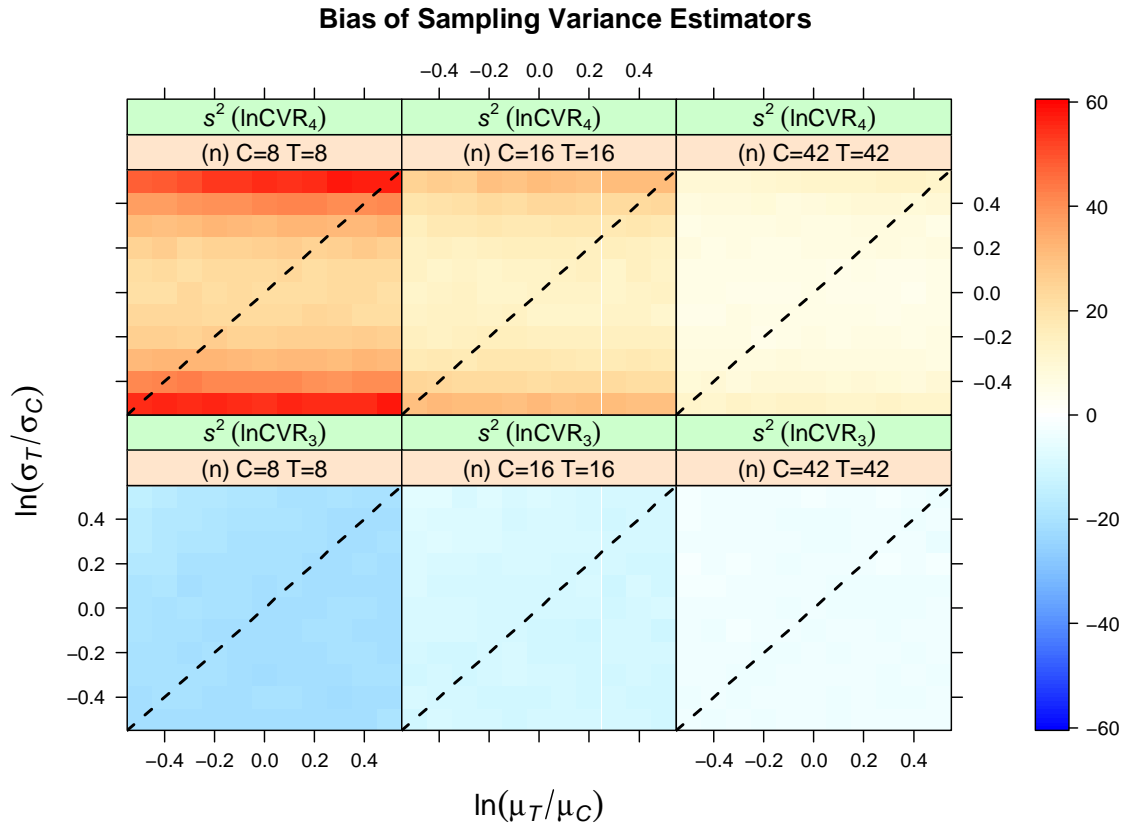

290

291 **Figure 5:** Bias in sampling variance estimators of lnCVR as a function of the log ratio of  
 292 population means ( $x$ -axis), SDs ( $y$ -axis) and sample size (balanced) for the case of dependent  
 293 treatment and control group data ( $\rho_{CT} = 0.8$ ). Black dashed line indicates no effect (i.e.,  
 294  $\ln\text{CVR} = 0$ ).

295

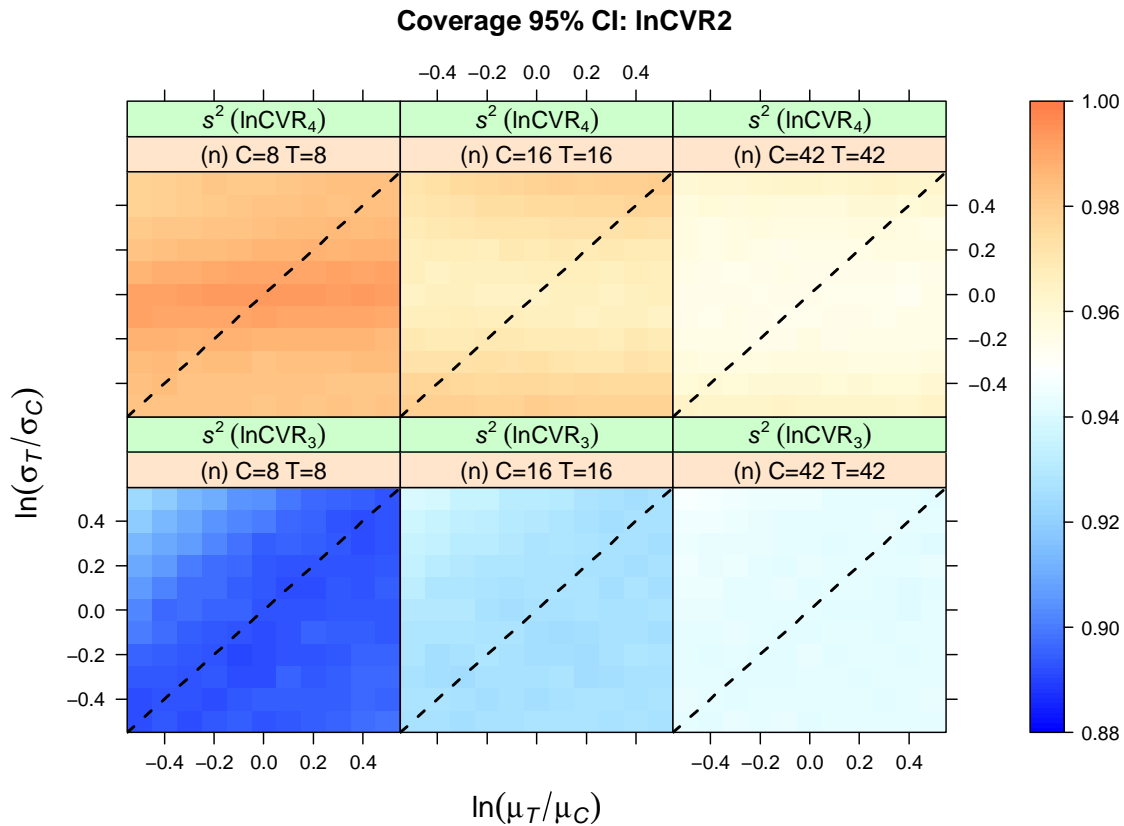

296  
 297 **Figure 6:** Coverage of 95% CIs based on estimators of the sampling variance of lnCVR as a  
 298 function of the log ratio of population means ( $x$ -axis), SDs ( $y$ -axis) and sample size  
 299 (balanced) for the case of dependent treatment and control group data ( $\rho_{CT} = 0.8$ ). Black  
 300 dashed line indicates no effect (i.e.,  $\ln\text{CVR} = 0$ ).

301

## 302 4. WORKED EXAMPLES

303 We now provide two examples: one from the field of ecology and the other from the health  
 304 sciences. All meta-analytic models (random-effects meta-analysis) were fitted using the ‘rma’  
 305 function (with default settings) in *metafor*<sup>32</sup>.

306

### 307 4.1 Example 1: Carbon dioxide levels and plant mass

308 Curtis, Wang<sup>33</sup> performed a meta-analysis of experimental studies that tested for the effects  
 309 of elevated carbon dioxide ( $\text{CO}_2$ ) levels on woody plant mass. Briefly, these studies

310 compared the total biomass (above and below ground) of plants grown under ambient and  
311 artificially elevated (~100% increase) CO<sub>2</sub> levels. Studies were performed in a range of  
312 contexts, including highly controlled (e.g., green houses) and less controlled (e.g., field sites)  
313 environments, as well as across temperature, light, water, and soil-fertility levels. Replication  
314 was at the level of the locale (e.g., plot/site/greenhouse) at which a treatment was applied,  
315 and treatment/control groups may be correlated (i.e., non-independent) if, for example,  
316 locales experiencing different treatments are paired spatially or temporally. However, the  
317 degree to which such correlations are present was not stated. Aggregating 102 effect sizes  
318 (lnRR), Curtis, Wang<sup>33</sup> found that the mean biomass of woody plants at a site increases by,  
319 on average, 28.8% under elevated CO<sub>2</sub> conditions. However, there was evidence that the  
320 effect is moderated by the presence of other stressors such as under nutrient- or light-limited  
321 conditions.

322

323 Here we ask whether elevated CO<sub>2</sub> levels also increase among-replicate variability in plant  
324 biomass using lnCVR. We tested the sensitivity of the analysis to the assumption that  
325 treatment and control groups are uncorrelated. Because we do not know precisely which  
326 effect size data come from paired designs, we calculated effect sizes and sampling variance  
327 assuming complete independence (0% of effect sizes have correlated groups), varying  
328 degrees of partial dependence (a random subset of 20%, 60%, or 80% effect sizes have  
329 correlated groups;  $r_{CT} = 0.8$ ), or complete dependence (100% of effect sizes have correlated  
330 groups;  $r_{CT} = 0.8$ ). For those effect sizes that were assumed to be uncorrelated we used  
331 lnCVR<sub>2</sub> and  $s^2(\ln\text{CVR}_2)$ , and for those that are correlated lnCVR<sub>4</sub> and  $s^2(\ln\text{CVR}_3)$ .

332

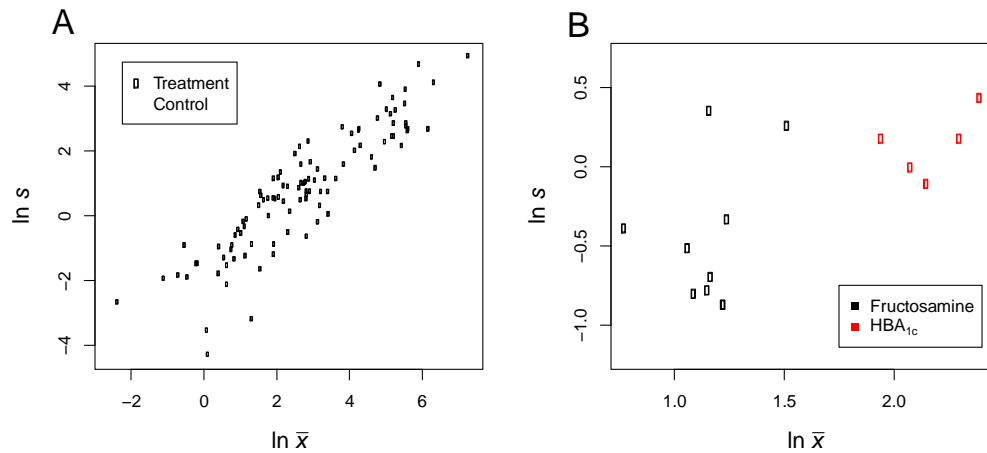

333

334 **Figure 7:** Association between log sample mean ( $\ln \bar{x}$ ) and log sample standard deviation ( $\ln$   
335  $s$ ) for treatment (hollow points) and control (solid points) groups in the data from; A) Curtis,  
336 Wang<sup>33</sup>, where the outcome is woody plant biomass under elevated (treatment) *vs* ambient  
337 (control) CO<sub>2</sub> levels; and B) Brand-Miller et al. (2003) where the outcome is a measure of  
338 glycemia in diabetic individuals on low (treatment) *vs* high (control) glycemc index diets.  
339 Note in (B) measures of glycemia are either fructosamine (black points) or HbA<sub>1c</sub> (red points)  
340 levels, where lower levels indicate better glylcemic control.

341

342 There was evidence for a mean-variance relationship under both elevated and ambient CO<sub>2</sub>  
343 levels (Figure 7A). The influence of increasing the percentage of effect sizes that are assumed  
344 to come from correlated groups on a random-effects meta-analysis is shown in Table 1. There  
345 are some qualitative differences in the interpretation of the overall effect, whereby the  
346 associated CI spans zero in some cases, but not others (Table 1). In all cases the sign of the  
347 overall effect is stable and suggests that elevating CO<sub>2</sub> levels on average decreases the CV in  
348 biomass among replicates (possibly by somewhere between  $100 \times (1 - \exp(-0.078)) = 7.5$  to  
349  $100 \times (1 - \exp(-0.116)) = 10.9$  percent). The effect of increasing the number of studies with  
350 correlated groups on the estimated inter-effect size heterogeneity, is however, much more

351 dramatic. As less independence is assumed, the amount of heterogeneity (absolutely, in terms  
352 of  $\hat{\tau}^2$ , and relatively, in terms of  $I^2$ ) increases substantially (Table 1), such that when 40% or  
353 more of the studies are have used paired designs, Cochran's  $Q$  test yields a significant result.

354

#### 355 **4.2 Example 2: Low glycemic index diets and glycemic control in diabetic subjects**

356 Brand-Miller, Petocz, Hayne, Colagiuri<sup>34</sup> performed a meta-analysis of studies designed to  
357 test the effects of low glycemic index (GI) diets on bio-markers of glycemic control in  
358 diabetic (type 1 and 2) individuals. Individuals were given either low or high GI diets, after  
359 which glycemia was measured using HbA<sub>1c</sub> and/or fructosamine levels. These two markers  
360 quantify glycemia over longer vs shorter time periods respectively, where lower levels  
361 indicate better glycemic control. The studies differed somewhat in the overall GI of the diets  
362 used and the duration for which subjects were on the diets. The studies used a mixture of  
363 parallel designs where the individuals in each treatment group are completely independent,  
364 and cross-over designs where each individual was subject to both treatments. Brand-Miller,  
365 Petocz, Hayne, Colagiuri<sup>34</sup> acknowledged that for those studies with a cross-over design,  
366 there will be a degree of correlation among the treatment and control condition data. They  
367 tested the sensitivity of their results to any such correlation by repeating the analyses  
368 assuming complete independence ( $r_{CT} = 0$ ) and also assuming that groups are correlated ( $r_{CT}$   
369 = 0.34; based on one of the studies in their primary literature). Their analyses of 14 effect  
370 sizes (mean differences, expressed in terms of percent; 11 from studies with cross-over  
371 designs) suggested that measures of glycemia are decreased by 6.8 percentage points  
372 (improved glycemic control) on low GI diets irrespective of their assumptions about  
373 correlations among groups. The authors used a fixed-effect meta-analytic model, and did not  
374 present heterogeneity statistics.

375

376 We tested whether low GI diets affect inter-individual variability in glycemic control using  
377 InCVR. Unlike example 1, here we do know which studies contain dependent groups (those  
378 with cross-over designs), although the strength of the dependence is not precisely known. For  
379 independent designs we calculated effect sizes and sampling variances *via*  $\ln\text{CVR}_2$ , and  
380  $s^2(\ln\text{CVR}_2)$ . For those studies using a cross-over design we calculated  $\ln\text{CVR}_4$  and  
381  $s^2(\ln\text{CVR}_3)$  assuming treatment and control data are correlated with  $r_{CT} = 0, 0.3, 0.5, \text{ and } 0.8$ .  
382 Where more than one measure of glycemia was presented from a single study, we primarily  
383 use fructosamine levels (this being the more widely reported measure).

384

385 We observed a mean-variance relationship amongst both measures of glycemic control within  
386 the two treatment groups (Figure 7B). The results of random-effects meta-analyses fitted to  
387 the effect sizes are given in Table 2. The analyses estimated that on low-GI diets the CV in  
388 biomarkers of glycemic control is on average reduced by between 13% ( $100 \times (1 - \exp(-$   
389  $0.135))$ ) and 18% ( $100 \times (1 - \exp(-0.177))$ ) compared to high-GI diets. However, as the degree  
390 of correlation among data from cross-over trials increased, there was a marginal reduction in  
391 the overall effect magnitude and an increase in the associated SE (Table 2); for  $r_{CT} = 0.5$ , the  
392 overall effect was not statistically significant. With increasing correlation, heterogeneity also  
393 increased (Table 2). Where we assumed complete independence ( $r_{CT} = 0$ ), there was no  
394 evidence for heterogeneity, but for  $r_{CT} = 0.8$ , we detected inter effect size heterogeneity  
395 (Table 2).

396

## 397 **5. DISCUSSION AND CONCLUSIONS**

398 We recommend that meta-analysts use the following estimator of the InCVR for independent  
399 study designs:

$$\ln\text{CVR}_{\text{ind}} = \ln\left(\frac{\text{CV}_T}{\text{CV}_C}\right) + \frac{1}{2}\left(\frac{1}{n_T - 1} - \frac{1}{n_C - 1}\right) + \frac{1}{2}\left(\frac{s_C^2}{n_C \bar{x}_C^2} - \frac{s_T^2}{n_T \bar{x}_T^2}\right).$$

400 For dependent study designs we recommend the use of the following point estimator:

$$\ln\text{CVR}_{\text{dep}} = \ln\left(\frac{\text{CV}_T}{\text{CV}_C}\right) + \frac{1}{2}\left(\frac{s_C^2}{n \bar{x}_C^2} - \frac{s_T^2}{n \bar{x}_T^2}\right).$$

401 Under the simulated conditions explored, these estimators exhibited minimal bias, where  
 402 ‘naïve’ estimators displayed systematic biases, substantially overestimating large positive  
 403 effects, especially when sample sizes were small. Compared to previous estimators<sup>15</sup>, this  
 404 revision contains an additional term,  $\frac{1}{2}\left(\frac{s_C^2}{n_C \bar{x}_C^2} - \frac{s_T^2}{n_T \bar{x}_T^2}\right)$ , which has also been shown to reduce  
 405 bias in mean effects estimated *via* lnRR<sup>23</sup>. We also recommend that the following estimators  
 406 for the sampling variance of lnCVR be used for independent and dependent study designs,  
 407 respectively:

$$\begin{aligned} s^2(\ln\text{CVR}_{\text{ind}}) &= \frac{s_C^2}{n_C \bar{x}_C^2} + \frac{s_C^4}{2n_C^2 \bar{x}_C^4} + \frac{1}{2(n_C - 1)} + \frac{1}{2(n_C - 1)^2} \\ &+ \frac{s_T^2}{n_T \bar{x}_T^2} + \frac{s_T^4}{2n_T^2 \bar{x}_T^4} + \frac{1}{2(n_T - 1)} + \frac{1}{2(n_T - 1)^2}, \\ s^2(\ln\text{CVR}_{\text{dep}}) &= \frac{s_C^2}{n \bar{x}_C^2} + \frac{s_T^2}{n \bar{x}_T^2} - r_{CT} \frac{2s_C s_T}{n \bar{x}_C \bar{x}_T} + \frac{1}{n - 1} - r_{CT}^2 \frac{1}{n - 1}. \end{aligned}$$

408 Our simulations demonstrate that the estimator for independent designs performs very well  
 409 and 95% CIs based on a  $z$  distribution give coverage at the nominal level. The estimator for  
 410 dependent cases slightly underestimates the actual sampling variance in lnCVR, and will  
 411 generate CIs (based on  $z$  or  $t$  distributions) that are slightly too narrow. This might be due to  
 412 the substitution of  $r_{CT}$  for the unknown true correlation in the equation for the sampling  
 413 variance without further account of the additional source of uncertainty this introduces. CIs  
 414 that are too narrow may be more troublesome in that they can lead to inflated type-1 error  
 415 rates (a more conservative estimator,  $s^2(\ln\text{CVR}_4)$ , is given above, although this approach may

416 substantially overestimate the sampling variance for small samples). Note that these  
417 recommended estimators are now available in the ‘escalc’ function in the development  
418 version of *metafor* (<https://github.com/wwiechtb/metafor>), and will eventually be  
419 implemented in the CRAN version.

420

421 We used the recommended estimators to evaluate whether: 1) increased CO<sub>2</sub> levels affect  
422 variation in woody plant biomass, and 2) low-GI diets alter between-individual variation in  
423 glycemic control in diabetics. In both cases, we found that the treatments have a tendency to  
424 decrease the CV. In both cases the analyses were sensitive to assumptions about the degree to  
425 which treatment and control data are correlated. Assuming higher degrees of correlation  
426 resulted in small changes in the overall effect (and its standard error). Although these  
427 parameters were relatively stable, for estimates with CIs close to zero, changing assumptions  
428 about group independence can affect inference. Increasing the degree of correlation  
429 dramatically increased the estimated between-effect size heterogeneity, which could change  
430 conclusions about the consistency of the reported effects. This trend can be explained by the  
431 fact that as more/stronger correlations are assumed the sampling variances associated with  
432 the individual effect sizes shrink, effects are assumed to be more precise, and sampling  
433 variability therefore becomes less able to explain the variation among the effects. Our results  
434 corroborate the points made by Becker<sup>28</sup>, who introduced an estimator for the sampling  
435 variance of SMD for dependent groups.

436

437 As is the case with any exercise in data analysis, the most appropriate technique to use will  
438 depend on the question being asked. Where the analyst is able to determine with a reasonable  
439 degree of certainty that a mean-variance relationship does not exist, lnVR may be a more  
440 useful measure of between-group differences in variability than lnCVR. This is because



441 InCVR risks conflating effects on the SD with effects on the mean. In other instances, the  
442 user may be more interested in ascertaining whether a treatment alters the SD irrespective of  
443 a mean-variance relationship (e.g., in questions related to power and study design), and again  
444 InVR would be an appropriate choice. However, where mean-variance relationships are  
445 present, and the analyst is interested in whether the variation is greater/lower than expected  
446 given the mean, InCVR is useful. For some matters, it may even be common practice for the  
447 primary literature to describe variation in terms of CV rather than SD. For instance, in  
448 ecology and evolution it is common to present CV when comparing variability amongst  
449 species/traits that exist on different scales because CV is a relative measure<sup>35</sup>. We note that  
450 such a practice is not necessarily required for meta-analysis because InVR is also a relative  
451 measure of variation, and as such should also do a good job of correcting for inter-system  
452 differences in scale. Nevertheless, where CV is the measure of variability commonly reported  
453 in the primary literature, the user may find it intuitive (or even necessary) to use InCVR.  
454  
455 Nakagawa, Poulin, Mengersen, et al.<sup>15</sup> also present alternative arm-based models (and  
456 discuss bivariate models) for meta-analysis of variation. The InCVR metric assumes that  
457 changes in the mean are associated with proportional changes in the SD. Arm-based (and  
458 bivariate) models are an alternative for meta-analysis which allow the user to circumvent the  
459 assumption of proportionality. Arm-based models, however, are not without their critics who  
460 argue that these methods are radical departure from established meta-analytic thinking (see  
461 <sup>16</sup>). Like other (contrast-based) effect size measures that reflect the difference between two  
462 groups (e.g., the standardized mean difference, log response ratio, log risk/odds ratio or the  
463 risk difference), InCVR readily integrates with our most widespread analytical paradigms,  
464 offering a convenient and intuitive method for meta-analysis of variability.  
465

466 Finally, we finish by reiterating the point made by Nakagawa, Poulin, Mengersen, et al.<sup>15</sup>,  
467 and echoed by subsequent papers using InCVR in different fields of study<sup>17-21</sup>. Meta-analysis  
468 of variation can tackle entirely new questions and open our eyes to insights that are hidden in  
469 datasets. The datasets required to gain these insights already exist because InCVR is based on  
470 the same summary statistics as SMD and InRR; means, SDs, and sample sizes. We suspect  
471 over 50,000 datasets of this sort have already been collected (c.f.<sup>36</sup>). In this regard it is vital  
472 that meta-analytic ‘raw’ data are made available and reusable in the spirit of open and  
473 transparent science<sup>37,38</sup>.  
474

475 **ACKNOWLEDGEMENTS**

476 AMS was supported by an Australian Research Council Discovery Early Career Researcher

477 Award (ARC DECRA: DE180101520). SN was supported by an ARC Discovery Grant

478 (DP180100818). We would like to thank Professor Jennie Brand-Miller for her thoughts on

479 our analysis of glycemia in diabetic individuals.

480

481 **REFERENCES**

- 482 1. Hedges LV, Olkin I. *Statistical methods for meta-analysis*. San Diego: Academic  
483 Press; 1985.
- 484 2. Nakagawa S, Cuthill IC. Effect size, confidence interval and statistical significance: A  
485 practical guide for biologists. *Biol Rev*. 2007; 82(4): 591-605.
- 486 3. Friedrich JO, Adhikari NK, Beyene J. The ratio of means method as an alternative to  
487 mean differences for analyzing continuous outcome variables in meta-analysis: A  
488 simulation study. *BMC Med Res Methodol*. 2008; 8(32).
- 489 4. Hedges LV, Gurevitch J, Curtis PS. The meta-analysis of response ratios in  
490 experimental ecology. *Ecology*. 1999; 80(4): 1150-1156.
- 491 5. Senior AM, Grueber CE, Kamiya T, et al. Heterogeneity in ecological and  
492 evolutionary meta-analyses: Its magnitude and implications. *Ecology*. 2016; 97(12):  
493 3293-3299.
- 494 6. Nakagawa S, Santos ESA. Methodological issues and advances in biological meta-  
495 analysis. *Evol Ecol*. 2012; 26(5): 1253-1274.
- 496 7. Koricheva J, Gurevitch J. Uses and misuses of meta-analysis in plant ecology. *J Ecol*.  
497 2014; 102(4): 828-844.
- 498 8. Cooper H, Hedges LV, Valentine JC. *The handbook of research synthesis and meta-  
499 analysis*. Russell Sage Foundation; 2009.
- 500 9. Osenberg CW, Sarnelle O, Cooper SD. Effect size in ecological experiments: The  
501 application of biological models in meta-analysis. *Am Nat*. 1997; 150(6): 798-812.
- 502 10. Cohen JE, Xu M. Random sampling of skewed distributions implies Taylor's power  
503 law of fluctuation scaling. *Proc Natl Acad Sci USA*. 2015; 112(25): 7749-7754.
- 504 11. Cohen JE, Xu M, Schuster WSF. Allometric scaling of population variance with mean  
505 body size is predicted from Taylor's law and density-mass allometry. *Proc Natl Acad  
506 Sci USA*. 2012; 109(39): 15829-15834.
- 507 12. Nakagawa S, Schielzeth H. The mean strikes back: Mean-variance relationships and  
508 heteroscedasticity. *Trends Ecol Evol*. 2012; 27(9): 474-475.
- 509 13. Taylor LR. Aggregation, variance and the mean. *Nature*. 1961; 189(4766): 732-735.
- 510 14. Bartlett MS. Some notes on insecticide tests in the laboratory and in the field.  
511 *Supplement to the Journal of the Royal Statistical Society*. 1936; 3(2): 185-194.
- 512 15. Nakagawa S, Poulin R, Mengersen K, et al. Meta-analysis of variation: Ecological  
513 and evolutionary applications and beyond. *Methods Ecol Evol*. 2015; 6(2): 143-152.
- 514 16. Dias S, Ades AE. Absolute or relative effects? Arm-based synthesis of trial data. *Res  
515 Syn Methods*. 2016; 7: 23-28.
- 516 17. Senior AM, Gosby AK, Lu J, Simpson SJ, Raubenheimer D. Meta-analysis of  
517 variance: An illustration comparing the effects of two dietary interventions on  
518 variability in weight. *Evol Med Public Health*. 2016; 2016(1): 244-255.
- 519 18. Senior AM, Nakagawa S, Lihoreau M, Simpson SJ, Raubenheimer D. An overlooked  
520 consequence of dietary mixing: A varied diet reduces inter-individual variance in  
521 fitness. *Am Nat*. 2015; 186(5): 649-659.
- 522 19. Janicke T, Häderer IK, Lajeunesse MJ, Anthes N. Darwinian sex roles confirmed  
523 across the animal kingdom. *Science Advances*. 2016; 2(2).
- 524 20. Knapp S, van der Heijden MGA. A global meta-analysis of yield stability in organic  
525 and conservation agriculture. *Nat Commun*. 2018; 9(1): 3632.
- 526 21. O'Dea RE, Lagisz M, Jennions MD, Nakagawa S. Gender differences in individual  
527 variation in academic grades fail to fit expected patterns for stem. *Nat Commun*. 2018;  
528 9(1): 3777.

- 529 22. Higgins JPT, Thompson SG. Quantifying heterogeneity in a meta-analysis. *Stat Med.*  
530 2002; 21(11): 1539-1558.
- 531 23. Lajeunesse MJ. Bias and correction for the log response ratio in ecological meta-  
532 analysis. *Ecology.* 2015; 96(8): 2056-2063.
- 533 24. Raudenbush SW, Bryk AS. Examining correlates of diversity. *Journal of Educational*  
534 *Statistics.* 1987; 12: 241-269.
- 535 25. Sokal R, Rohlf FJ. *Biometry.* 3 ed. New York: Freeman; 1995.
- 536 26. Zhang L. Sample mean and sample variance. *American Statistician.* 2007; 6(2): 159-  
537 160.
- 538 27. Noble DWA, Lagisz M, O'Dea RE, Nakagawa S. Nonindependence and sensitivity  
539 analyses in ecological and evolutionary meta-analyses. *Mol Ecol.* 2017; 26(9): 2410-  
540 2425.
- 541 28. Becker BJ. Synthesizing standardized mean change measures. *Br J Math Stat*  
542 *Psychol.* 1988; 41(2): 257-278.
- 543 29. Lajeunesse MJ. On the meta-analysis of response ratios for studies with correlated  
544 and multi-group designs. *Ecology.* 2011; 92(11): 2049-2055.
- 545 30. *R: A language and environment for statistical computing* [computer program].  
546 Version 3.5.1. Available at <http://www.r-project.org.2018>.
- 547 31. Venables WN, Ripley BD. *Modern applied statistics with s.* 4 ed. New York:  
548 Springer; 2002.
- 549 32. Viechtbauer W. Conducting meta-analyses in r with the metafor package. *J Stat*  
550 *Softw.* 2010; 36: 1-48.
- 551 33. Curtis PS, Wang X. A meta-analysis of elevated co2 effects on woody plant mass,  
552 form, and physiology. *Oecologia.* 1998; 113(3): 299-313.
- 553 34. Brand-Miller J, Petocz P, Hayne S, Colagiuri S. Low-glycemic index diets in the  
554 management of diabetes. *Diabetes Care.* 2003; 26(8): 2261-2267.
- 555 35. Van Valen L. The statistics of variation. *Evol Theory.* 1978; 4(433-443).
- 556 36. Gurevitch J, Koricheva J, Nakagawa S, Stewart G. Meta-analysis and the science of  
557 research synthesis. *Nature.* 2018; 8(555): 175-182.
- 558 37. Nosek BA, Alter G, Banks GC, et al. Promoting an open research culture. *Science.*  
559 2015; 348(6242): 1422.
- 560 38. Parker TH, Forstmeier W, Koricheva J, et al. Transparency in ecology and evolution:  
561 Real problems, real solutions. *Trends Ecol Evol.* 2016; 31(9): 711-719.
- 562

563

564 **Table 1:** Estimates of the overall effect (lnCVR) and heterogeneity statistics from random-  
565 effects meta-analyses of woody plant biomass under elevated vs ambient CO<sub>2</sub> levels.  
566 Negative estimates indicate lower CV under elevated CO<sub>2</sub>. Models were refitted based on  
567 effect sizes assuming increasing % of the effect sizes contain correlated (dependent)  
568 treatment and control group data ( $r_{CT} = 0.8$ ). LCI and UCI indicate the lower and upper 95%  
569 confidence interval bounds. Data from Curtis, Wang<sup>33</sup>.

| % Correlated | Estimate | SE    | LCI    | UCI    | $\tau^2$ | $I^2$ | $Q$   | $p(Q)$ |
|--------------|----------|-------|--------|--------|----------|-------|-------|--------|
| 0            | -0.078   | 0.044 | -0.163 | 0.008  | 0.000    | 0.000 | 85.75 | 0.861  |
| 20           | -0.090   | 0.055 | -0.198 | 0.017  | 0.082    | 35.02 | 141.0 | 0.005  |
| 40           | -0.093   | 0.057 | -0.205 | 0.019  | 0.133    | 55.00 | 191.8 | <0.001 |
| 60           | -0.095   | 0.057 | -0.207 | 0.017  | 0.161    | 64.28 | 240.7 | <0.001 |
| 80           | -0.118   | 0.054 | -0.225 | -0.011 | 0.165    | 68.31 | 267.0 | <0.001 |
| 100          | -0.116   | 0.053 | -0.219 | -0.012 | 0.17     | 73.77 | 294.2 | <0.001 |

570

571 **Table 2:** Estimates of overall effect (lnCVR) and heterogeneity from random-effects meta-  
572 analyses of glycemic control in diabetics on low- vs high-GI diets. Negative estimates  
573 indicate lower CV on a low-GI diet. Models were refitted from effect sizes assuming  
574 differing strength of correlation ( $r_{CT}$ ) among repeated measured from the same individuals in  
575 cross-over trials. LCI and UCI indicate the lower and upper 95% confidence interval bounds.  
576 Data from Brand-Miller, Petocz, Hayne, Colagiuri<sup>34</sup>.

| $r_{CT}$ | Estimate | SE    | LCI    | UCI    | $\tau^2$ | $I^2$ | $Q$   | $p(Q)$ |
|----------|----------|-------|--------|--------|----------|-------|-------|--------|
| 0        | -0.177   | 0.070 | -0.314 | -0.039 | <0.001   | 0.006 | 15.88 | 0.321  |
| 0.3      | -0.162   | 0.075 | -0.308 | -0.015 | 0.012    | 15.14 | 18.92 | 0.168  |
| 0.5      | -0.151   | 0.080 | -0.307 | 0.006  | 0.030    | 32.73 | 22.33 | 0.072  |
| 0.8      | -0.135   | 0.091 | -0.314 | 0.044  | 0.085    | 70.44 | 42.58 | <0.001 |

577
